# Supplementary material
Source: Springer Nature journal article supplement (https://www.springermedizin.de/resource/supplementary/13643_2012_50_MOESM2_ESM.pdf/9681370)
Supplement: MOESM2 [file 9681370]

**‘Known set’ of views studies with controlled vocabulary terms**

| Article                                                                                                                                                                            | PubMed                                                                                                                                                                                                                                                                                                                                                                                                       | Psych Info                                                                                                                                                                                                                                                                                                                                                                       | CINAHL                                                                                                                                                                                                                                                                                                                                                                                                                                                                                                                                                                                                                                                                                                                                                    | Sociological abstracts/<br>Social<br>ServicesAbstracts/<br>PAIS /ERIC                                                                                                                                                                                        |
|------------------------------------------------------------------------------------------------------------------------------------------------------------------------------------|--------------------------------------------------------------------------------------------------------------------------------------------------------------------------------------------------------------------------------------------------------------------------------------------------------------------------------------------------------------------------------------------------------------|----------------------------------------------------------------------------------------------------------------------------------------------------------------------------------------------------------------------------------------------------------------------------------------------------------------------------------------------------------------------------------|-----------------------------------------------------------------------------------------------------------------------------------------------------------------------------------------------------------------------------------------------------------------------------------------------------------------------------------------------------------------------------------------------------------------------------------------------------------------------------------------------------------------------------------------------------------------------------------------------------------------------------------------------------------------------------------------------------------------------------------------------------------|--------------------------------------------------------------------------------------------------------------------------------------------------------------------------------------------------------------------------------------------------------------|
| <p><b>1. Anderson, J and Doyal, L (2004).</b> <i>Women from Africa living with HIV in London: a descriptive study.</i> <u>AIDS Care</u>, 16 (1), 95-105.</p>                       | <p>MH - Adult<br/>MH - Africa/ethnology<br/>MH - African Continental Ancestry Group/ethnology<br/>MH - Emigration and Immigration<br/>MH - Female<br/>MH - HIV Infections/ethnology/<br/>*psychology<br/>MH - Humans<br/>MH - London/epidemiology<br/>MH - Middle Aged<br/>MH - Needs Assessment<br/>MH - Patient Acceptance of Health Care/<br/>psychology<br/>MH - Prejudice<br/>MH - Truth Disclosure</p> | <p>Subject Headings: <a href="#">*HIV</a><br/><a href="#">*Hospitals</a><br/><a href="#">*Patient History</a><br/><a href="#">*Public Health Services</a><br/><a href="#">Human Females</a><br/><a href="#">Patients</a><br/>Key concepts:<br/><a href="#">Human Immunodeficiency Virus, HIV-positive African women, London hospitals, illness biographies, life history</a></p> | <p>Subject headings:<br/><a href="#">Adult</a><br/><a href="#">Africa</a><br/><a href="#">Blacks</a><br/><a href="#">Descriptive Research</a><br/><a href="#">Descriptive Statistics</a><br/><a href="#">Emigration and Immigration</a><br/><a href="#">England</a><br/><a href="#">Female</a><br/><a href="#">Funding Source</a><br/><a href="#">HIV Infections / eh [Ethnology]</a><br/><a href="#">*HIV Infections / pf [Psychosocial Factors]</a><br/><a href="#">Interviews</a><br/><a href="#">Middle Age</a><br/><a href="#">Needs Assessment</a><br/><a href="#">Patient Compliance</a><br/><a href="#">Prejudice</a><br/><a href="#">Purposive Sample</a><br/><a href="#">Structured Questionnaires</a><br/><a href="#">Truth Disclosure</a></p> | <p>Descriptors:<br/><a href="#">*London, England</a><br/><a href="#">*African Cultural Groups</a><br/><a href="#">*Females</a><br/><a href="#">*Acquired Immune Deficiency Syndrome</a><br/><a href="#">*Self Evaluation</a><br/><a href="#">*Stigma</a></p> |
| <p><b>2. Godin, G Maticka-Tyndale, E, Adrien, A Singer SM, Willms, D Cappon, P, Bradet, R Daus, T, LeMay, G (1996).</b> <i>Understanding the use of condoms among Canadian</i></p> | <p>MH - Acquired Immunodeficiency Syndrome<br/>*ethnology/*prevention &amp; control<br/>MH - Adolescent<br/>MH - Adult<br/>MH - Canada<br/>MH - Condoms/*utilization<br/>MH - Emigration and Immigration<br/>MH - *Ethnic Groups<br/>MH - Female<br/>MH - Humans<br/>MH - Male</p>                                                                                                                           | <p>Not found</p>                                                                                                                                                                                                                                                                                                                                                                 | <p>Subject headings:<br/><a href="#">*Acquired Immunodeficiency Syndrome / eh [Ethnology]</a><br/><a href="#">*Acquired Immunodeficiency Syndrome / pc [Prevention and Control]</a><br/><a href="#">Adolescence</a><br/><a href="#">Adult</a><br/><a href="#">Canada</a><br/><a href="#">*Condoms / ut [Utilization]</a><br/><a href="#">Confidence Intervals</a><br/><a href="#">Emigration and Immigration</a></p>                                                                                                                                                                                                                                                                                                                                      | <p>Not found</p>                                                                                                                                                                                                                                             |

|                                                                                                                                                                                                                      |                                                                                                                                                                       |                                                                                                                                                                                                                                                                                                                                                                                                                                                                                                                                                                                                                                                                                                                                                                                                  |                                                                                                                                                                                                                                                                                                                                                                                                                                                                                                          |                                                                                                                                                                                                                                                                                                                                                                                                                           |
|----------------------------------------------------------------------------------------------------------------------------------------------------------------------------------------------------------------------|-----------------------------------------------------------------------------------------------------------------------------------------------------------------------|--------------------------------------------------------------------------------------------------------------------------------------------------------------------------------------------------------------------------------------------------------------------------------------------------------------------------------------------------------------------------------------------------------------------------------------------------------------------------------------------------------------------------------------------------------------------------------------------------------------------------------------------------------------------------------------------------------------------------------------------------------------------------------------------------|----------------------------------------------------------------------------------------------------------------------------------------------------------------------------------------------------------------------------------------------------------------------------------------------------------------------------------------------------------------------------------------------------------------------------------------------------------------------------------------------------------|---------------------------------------------------------------------------------------------------------------------------------------------------------------------------------------------------------------------------------------------------------------------------------------------------------------------------------------------------------------------------------------------------------------------------|
| <p><i>ethnocultural communities: Methods and main findings of the survey. Canadian Journal of Public Health, 87 (Suppl 1), S33-S37.</i></p>                                                                          | <p>MH - Middle Aged<br/> MH - Questionnaires<br/> MH - Role<br/> MH - Sampling Studies<br/> MH - Sexual Behavior<br/> MH - Social Behavior<br/> MH - Time Factors</p> |                                                                                                                                                                                                                                                                                                                                                                                                                                                                                                                                                                                                                                                                                                                                                                                                  | <p><a href="#">*Ethnic Groups</a><br/> <a href="#">Ethnological Research</a><br/> <a href="#">Female</a><br/> <a href="#">Funding Source</a><br/> <a href="#">Male</a><br/> <a href="#">Middle Age</a><br/> <a href="#">Questionnaires</a><br/> <a href="#">Research Methodology</a><br/> <a href="#">Risk Factors</a><br/> <a href="#">*Risk Taking Behavior</a><br/> <a href="#">Role</a><br/> <a href="#">Sexuality</a><br/> <a href="#">Summated Rating Scaling</a><br/> <a href="#">Surveys</a></p> |                                                                                                                                                                                                                                                                                                                                                                                                                           |
| <p><b>3.Dawson, MT Gifford, SM. (2001)</b><br/> <i>Narratives, culture and sexual health: Personal life experiences of Salvadorean and Chilean women living in Melbourne, Australia. Health, 5 (4), 403-423.</i></p> | <p>Not found</p>                                                                                                                                                      | <p>Subject Headings:<br/> <a href="#">*Cross Cultural Differences</a><br/> <a href="#">*Health Promotion</a><br/> <a href="#">*Sexuality</a><br/> <a href="#">*Sexually Transmitted Diseases</a><br/> <a href="#">*Sociocultural Factors</a><br/> <a href="#">HIV</a><br/> <a href="#">Human Females</a><br/> <a href="#">Human Migration</a><br/> <a href="#">Human Sex Differences</a><br/> <a href="#">Narratives</a><br/> <a href="#">Prevention</a><br/> <a href="#">Sex Roles</a><br/> <a href="#">Strategies</a><br/> Key concepts:<br/> <a href="#">culture</a>, <a href="#">gender</a>, <a href="#">sexuality</a>,<br/> <a href="#">women's health</a>, <a href="#">narratives</a>,<br/> <a href="#">STD prevention</a>, <a href="#">prevention strategies</a>, <a href="#">HIV</a></p> | <p>Not found</p>                                                                                                                                                                                                                                                                                                                                                                                                                                                                                         | <p>Descriptors:<br/> <a href="#">*Sexual Behavior</a><br/> <a href="#">*Health Education</a><br/> <a href="#">*Acquired Immune Deficiency Syndrome</a><br/> <a href="#">*Venereal Diseases</a><br/> <a href="#">*Latin American Cultural Groups</a><br/> <a href="#">*Immigrants</a><br/> *Females<br/> *Cultural sensitivity<br/> *Melbourne, Australia<br/> Sex roles<br/> Sex role identity<br/> Cultural identity</p> |

|                                                                                                                                                                                                                                                                                                  |                                                                                                                                                                                                                                                                                                                                                                                                                                                                                                                                |                                                                                                                                                                                                                                                                                                                                                                                                                                                                                                                                                                                                    |                                                                                                                                                                                                                                                                                                                                                                                                                                                                                                                                                                                                                                                                                                                                                                                                                                |                                                                                                                                                                                                                                                                                                                                                                                                                                                                                                                                                                           |
|--------------------------------------------------------------------------------------------------------------------------------------------------------------------------------------------------------------------------------------------------------------------------------------------------|--------------------------------------------------------------------------------------------------------------------------------------------------------------------------------------------------------------------------------------------------------------------------------------------------------------------------------------------------------------------------------------------------------------------------------------------------------------------------------------------------------------------------------|----------------------------------------------------------------------------------------------------------------------------------------------------------------------------------------------------------------------------------------------------------------------------------------------------------------------------------------------------------------------------------------------------------------------------------------------------------------------------------------------------------------------------------------------------------------------------------------------------|--------------------------------------------------------------------------------------------------------------------------------------------------------------------------------------------------------------------------------------------------------------------------------------------------------------------------------------------------------------------------------------------------------------------------------------------------------------------------------------------------------------------------------------------------------------------------------------------------------------------------------------------------------------------------------------------------------------------------------------------------------------------------------------------------------------------------------|---------------------------------------------------------------------------------------------------------------------------------------------------------------------------------------------------------------------------------------------------------------------------------------------------------------------------------------------------------------------------------------------------------------------------------------------------------------------------------------------------------------------------------------------------------------------------|
| <p><b>4. Kwong-Lai Poon, M Trung-Thu Ho, P, Pui-Hing Wong, J, Wong, G &amp; Lee, R. (2005).</b><br/><i>Psychosocial experiences of East and Southeast Asian men who use gay internet chatrooms in Toronto: an implication for HIV/AIDS prevention. Ethnicity and Health</i>, 10(2), 145-167.</p> | <p>MH - Asia, Southeastern/ethnology<br/>MH - HIV Infections/*prevention &amp; control<br/>MH - *Homosexuality, Male<br/>MH - Humans<br/>MH - *Internet<br/>MH - Male<br/>MH - Ontario<br/>MH - *Psychology</p>                                                                                                                                                                                                                                                                                                                | <p>Subject Headings:<br/><a href="#">*AIDS Prevention</a><br/><a href="#">*Asians</a><br/><a href="#">*Internet</a><br/><a href="#">*Male Homosexuality</a><br/><a href="#">*Psychosocial Factors</a><br/><a href="#">Electronic Communication</a><br/><a href="#">Human Males</a><br/><a href="#">Southeast Asian Cultural Groups</a></p> <p>Key concepts:<br/><a href="#">psychosocial experiences</a>,<br/><a href="#">East Asian men</a>, <a href="#">Southeast Asian men</a>, <a href="#">gay Internet chatrooms</a>, <a href="#">Toronto</a>, <a href="#">AIDS prevention strategies</a></p> | <p>Subject headings:<br/><a href="#">*Acquired Immunodeficiency Syndrome / pc [Prevention and Control]</a><br/><a href="#">*Acquired Immunodeficiency Syndrome / ut [Utilization]</a><br/><a href="#">Adult</a><br/><a href="#">Asians</a><br/><a href="#">Attitude to Sexuality</a><br/><a href="#">Conceptual Framework</a><br/><a href="#">Descriptive Statistics</a><br/><a href="#">Grounded Theory</a><br/><a href="#">*Homosexuality</a><br/><a href="#">*Internet / ut [Utilization]</a><br/><a href="#">Interviews</a><br/><a href="#">Male</a><br/><a href="#">Ontario</a><br/><a href="#">Purposive Sample</a><br/><a href="#">Qualitative Studies</a><br/><a href="#">Snowball Sample</a><br/><a href="#">Social Isolation</a><br/><a href="#">Support, Psychosocial</a><br/><a href="#">Thematic Analysis</a></p> | <p>Descriptors:<br/><a href="#">*Homosexuality</a><br/><a href="#">*Prevention and Control</a><br/><a href="#">*Internet</a><br/><a href="#">*Psychosocial Factors</a><br/><a href="#">*Asian Cultural Groups</a><br/><a href="#">*Sexual Behavior</a><br/><a href="#">*Males</a><br/><a href="#">*Venereal Diseases</a><br/><a href="#">*Acquired Immune Deficiency Syndrome</a><br/><a href="#">*Prevention</a><br/><a href="#">*Psychosocial factors</a><br/><a href="#">Social isolation</a><br/><a href="#">Toronto, Ontario</a><br/><a href="#">Marginality</a></p> |
| <p><b>5. McMunn, AM Mwanje, R Paine, K Pozniak, AL. (1998).</b> <i>Health service utilization in London's African migrant communities: implications for HIV prevention. AIDS Care</i>, 10(4), 453-462.</p>                                                                                       | <p>MH - Adult<br/>MH - Cross-Sectional Studies<br/>MH - Family Practice/ statistics &amp; numerical data<br/>MH - Female<br/>MH - HIV Infections/ethnology/ *prevention &amp; control<br/>MH - Health Promotion<br/>MH - Humans<br/>MH - London/epidemiology<br/>MH - Male<br/>MH - Middle Aged<br/>MH - *Patient Acceptance of Health Care/ ethnology<br/>MH - Patient Satisfaction<br/>MH - Preventive Health Services/*utilization<br/>MH - Sex Distribution<br/>MH - Transients and Migrants<br/>MH - Uganda/ethnology</p> | <p>Subject Headings:<br/><a href="#">*AIDS Prevention</a><br/><a href="#">*Health Attitudes</a><br/><a href="#">*Health Care Utilization</a><br/><a href="#">*Health Promotion</a><br/><a href="#">*HIV</a><br/><a href="#">Health Knowledge</a></p> <p>Key concepts:<br/><a href="#">knowledge &amp; attitudes &amp; beliefs &amp; practices of health service utilization &amp; health promotion</a>, <a href="#">Black Africans from Uganda residing in London</a>, <a href="#">implications for HIV prevention</a></p>                                                                         | <p>Subject headings:<br/><a href="#">Adult</a><br/><a href="#">Chi Square Test</a><br/><a href="#">Content Validity</a><br/><a href="#">Cross Sectional Studies</a><br/><a href="#">Descriptive Statistics</a><br/><a href="#">Female</a><br/><a href="#">HIV Education</a><br/><a href="#">*HIV Infections / pc [Prevention and Control]</a><br/><a href="#">Health Knowledge</a><br/><a href="#">*Health Resource Utilization</a><br/><a href="#">Male</a><br/><a href="#">Middle Age</a><br/><a href="#">Nonprobability Sample</a><br/><a href="#">Primary Health Care</a><br/><a href="#">Purposive Sample</a><br/><a href="#">Questionnaires</a><br/><a href="#">Semi-Structured Interview</a></p>                                                                                                                        | <p>Descriptors:<br/><a href="#">*Health Care Utilization</a><br/><a href="#">*London, England</a><br/><a href="#">*Southern African Cultural Groups</a><br/><a href="#">*Migrants</a><br/><a href="#">*Acquired Immune Deficiency Syndrome</a><br/><a href="#">*Prevention</a><br/><a href="#">*Health Education</a><br/><a href="#">*Client satisfaction</a></p>                                                                                                                                                                                                         |

|                                                                                                                                                                                  |                                                                                                                                                                                                                                                                                                                              |                                                                                                                                                                                                                                                                                                                                                                                                                                                                                                                                                                                                              |                                                                                                                                                                                                                                                                                                                                                                                                                                                                                                                                                                       |           |
|----------------------------------------------------------------------------------------------------------------------------------------------------------------------------------|------------------------------------------------------------------------------------------------------------------------------------------------------------------------------------------------------------------------------------------------------------------------------------------------------------------------------|--------------------------------------------------------------------------------------------------------------------------------------------------------------------------------------------------------------------------------------------------------------------------------------------------------------------------------------------------------------------------------------------------------------------------------------------------------------------------------------------------------------------------------------------------------------------------------------------------------------|-----------------------------------------------------------------------------------------------------------------------------------------------------------------------------------------------------------------------------------------------------------------------------------------------------------------------------------------------------------------------------------------------------------------------------------------------------------------------------------------------------------------------------------------------------------------------|-----------|
|                                                                                                                                                                                  |                                                                                                                                                                                                                                                                                                                              |                                                                                                                                                                                                                                                                                                                                                                                                                                                                                                                                                                                                              | <a href="#">Snowball Sample</a><br><a href="#">*Transients and Migrants</a><br><a href="#">Two-Tailed Test</a><br><a href="#">Uganda / eh [Ethnology]</a><br><a href="#">United Kingdom</a>                                                                                                                                                                                                                                                                                                                                                                           |           |
| <b>6. Stolte, IG Gras, M Van Benthem, BHB Coutinho, RA Van Den Hoek, JAR. (2003). HIV testing behaviour among heterosexual migrants in Amsterdam. AIDS Care, 15(4), 563-574.</b> | MH - Adolescent<br>MH - Adult<br>MH - Cross-Sectional Studies<br>MH - Female<br>MH - HIV Infections/*diagnosis<br>MH - *Heterosexuality<br>MH - Humans<br>MH - Male<br>MH - Mass Screening/*methods<br>MH - Middle Aged<br>MH - Netherlands<br>MH - Sexual Behavior<br>MH - Sexual Partners<br>MH - *Transients and Migrants | Subject Headings:<br><a href="#">*Heterosexuality</a><br><a href="#">*HIV Testing</a><br><a href="#">*Immigration</a><br><a href="#">Human Sex Differences</a><br><br>Key concepts:<br><a href="#">heterosexual migrant groups</a> , <a href="#">HIV testing behavior</a> , <a href="#">Amsterdam</a> , <a href="#">sex differences</a>                                                                                                                                                                                                                                                                      | Not found                                                                                                                                                                                                                                                                                                                                                                                                                                                                                                                                                             | Not found |
| <b>7. Yoshioka, MR Schustack, A. (2001). Disclosure of HIV status: cultural issues of Asian patients. AIDS Patient Care and STDs, 15(2), 77-82.</b>                              | MH - Adult<br>MH - Asian Americans/*psychology<br>MH - China/ethnology<br>MH - Family<br>MH - HIV Infections/*psychology<br>MH - Homosexuality, Male/*psychology<br>MH - Humans<br>MH - Male<br>MH - Middle Aged<br>MH - *Self Disclosure<br>MH - Stress, Psychological/*etiology                                            | Subject Headings:<br><a href="#">*Asians</a><br><a href="#">*Culture (Anthropological)</a><br><a href="#">*Family Relations</a><br><a href="#">*HIV</a><br><a href="#">*Self Disclosure</a><br><a href="#">Bisexuality</a><br><a href="#">Family Members</a><br><a href="#">Male Homosexuality</a><br><a href="#">Social Values</a><br><a href="#">Sociocultural Factors</a><br><br>Key concepts:<br><a href="#">Asian cultural values</a> , <a href="#">family members</a> , <a href="#">disclosure</a> , <a href="#">HIV status</a> , <a href="#">Asian Americans</a> , <a href="#">male homosexuality</a> | Subject Headings:<br><a href="#">*AIDS Patients / pf [Psychosocial Factors]</a><br><a href="#">Adult</a><br><a href="#">*Asians</a><br><a href="#">Audiorecording</a><br><a href="#">Cultural Values</a><br><a href="#">Ethnological Research</a><br><a href="#">Interviews</a><br><a href="#">Male</a><br><a href="#">Middle Age</a><br><a href="#">New England</a><br><a href="#">Qualitative Studies</a><br><a href="#">Race Factors</a><br><a href="#">Research Subject Recruitment</a><br><a href="#">Thematic Analysis</a><br><a href="#">*Truth Disclosure</a> | Not found |

|                                                                                                                                                                                    |                  |                  |                                                                                                                                                                                                                                                                                                                                                                                                                                                                                                                                                                                                                                                                                                                                                                                                                                                                                                                                                                                                                                                                                                                                                               |                  |
|------------------------------------------------------------------------------------------------------------------------------------------------------------------------------------|------------------|------------------|---------------------------------------------------------------------------------------------------------------------------------------------------------------------------------------------------------------------------------------------------------------------------------------------------------------------------------------------------------------------------------------------------------------------------------------------------------------------------------------------------------------------------------------------------------------------------------------------------------------------------------------------------------------------------------------------------------------------------------------------------------------------------------------------------------------------------------------------------------------------------------------------------------------------------------------------------------------------------------------------------------------------------------------------------------------------------------------------------------------------------------------------------------------|------------------|
| <p><b>8. Chinouya, M O’Keefe, E. (2005).</b> <i>God will look after us: African, HIV and religion in Milton Keynes.</i> <u>Diversity in Health and Social Care</u>, 2,177-186.</p> | <p>Not found</p> | <p>Not found</p> | <p>Subject headings:<br/> <a href="#">AIDS Serodiagnosis</a><br/> <a href="#">Adult</a><br/> <a href="#">Africa</a><br/> <a href="#">Audiorecording</a><br/> <a href="#">*Blacks</a><br/> <a href="#">Christianity</a><br/> <a href="#">Churches</a><br/> <a href="#">Clergy</a><br/> <a href="#">Communication</a><br/> <a href="#">Coping</a><br/> <a href="#">*Emigration and Immigration</a><br/> <a href="#">England</a><br/> <a href="#">Female</a><br/> <a href="#">Focus Groups</a><br/> <a href="#">Funding Source</a><br/> <a href="#">HIV Infections / pc [Prevention and Control]</a><br/> <a href="#">*HIV Seropositivity</a><br/> <a href="#">Heterosexuality</a><br/> <a href="#">Interviews</a><br/> <a href="#">Islam</a><br/> <a href="#">Male</a><br/> <a href="#">Middle Age</a><br/> <a href="#">Multimethod Studies</a><br/> <a href="#">Prayer</a><br/> <a href="#">Professional Recognition</a><br/> <a href="#">Professional Role</a><br/> <a href="#">*Religion and Religions</a><br/> <a href="#">Self Disclosure</a><br/> <a href="#">Social Isolation</a><br/> <a href="#">Stigma</a><br/> <a href="#">Thematic Analysis</a></p> | <p>Not found</p> |
|------------------------------------------------------------------------------------------------------------------------------------------------------------------------------------|------------------|------------------|---------------------------------------------------------------------------------------------------------------------------------------------------------------------------------------------------------------------------------------------------------------------------------------------------------------------------------------------------------------------------------------------------------------------------------------------------------------------------------------------------------------------------------------------------------------------------------------------------------------------------------------------------------------------------------------------------------------------------------------------------------------------------------------------------------------------------------------------------------------------------------------------------------------------------------------------------------------------------------------------------------------------------------------------------------------------------------------------------------------------------------------------------------------|------------------|

|                                                                                                                                                                                                                                                               |                                                                                                                                                                                                                                                                                                                                                                                                                                                                                      |                                                                                                                                                                                                                                                                                                                                                                                                                                               |                                                                                                                                                                                                                                                                                                                                                                                                                                                                                                                                                                                                                                                                                                                                                                                                                                                                                                                                     |                                                                                                                                                                                                                                                                                                                                                     |
|---------------------------------------------------------------------------------------------------------------------------------------------------------------------------------------------------------------------------------------------------------------|--------------------------------------------------------------------------------------------------------------------------------------------------------------------------------------------------------------------------------------------------------------------------------------------------------------------------------------------------------------------------------------------------------------------------------------------------------------------------------------|-----------------------------------------------------------------------------------------------------------------------------------------------------------------------------------------------------------------------------------------------------------------------------------------------------------------------------------------------------------------------------------------------------------------------------------------------|-------------------------------------------------------------------------------------------------------------------------------------------------------------------------------------------------------------------------------------------------------------------------------------------------------------------------------------------------------------------------------------------------------------------------------------------------------------------------------------------------------------------------------------------------------------------------------------------------------------------------------------------------------------------------------------------------------------------------------------------------------------------------------------------------------------------------------------------------------------------------------------------------------------------------------------|-----------------------------------------------------------------------------------------------------------------------------------------------------------------------------------------------------------------------------------------------------------------------------------------------------------------------------------------------------|
| <p><b>9. Marks, G Cantero, PJ Simoni, JM. (1998).</b> <i>Is acculturation associated with sexual risk behaviours? An investigation of HIV-positive Latino men and women.</i> <u>AIDS Care</u>, 10(3), 283-295.</p>                                            | <p>MH - *Acculturation<br/> MH - Adult<br/> MH - Alcohol Drinking/ethnology<br/> MH - Analysis of Variance<br/> MH - Condoms/utilization<br/> MH - Cross-Sectional Studies<br/> MH - Female<br/> MH - HIV Infections/*ethnology<br/> MH - *Hispanic Americans<br/> MH - Humans<br/> MH - Los Angeles/epidemiology<br/> MH - Male<br/> MH - Prevalence<br/> MH - Risk-Taking<br/> MH - *Sexual Behavior<br/> MH - Sexual Partners<br/> MH - Substance-Related Disorders/ethnology</p> | <p>Subject Headings:<br/> <a href="#">*Acculturation</a><br/> <a href="#">*Drug Usage</a><br/> <a href="#">*Hispanics</a><br/> <a href="#">*HIV</a><br/> <a href="#">*Sexual Risk Taking</a><br/> <a href="#">Human Sex Differences</a></p> <p>Key concepts:<br/> <a href="#">association of acculturation &amp; substance use prior to sex with sexual risk behaviors, HIV+ Hispanic males &amp; females</a></p>                             | <p>Subject headings:<br/> <a href="#">*Acculturation</a><br/> <a href="#">Adult</a><br/> <a href="#">Alcohol Drinking / eh [Ethnology]</a><br/> <a href="#">Analysis of Variance</a><br/> <a href="#">California</a><br/> <a href="#">Chi Square Test</a><br/> <a href="#">Condoms / ut [Utilization]</a><br/> <a href="#">Cross Sectional Studies</a><br/> <a href="#">Epidemiological Research</a><br/> <a href="#">Female</a><br/> <a href="#">Funding Source</a><br/> <a href="#">*HIV Infections / eh [Ethnology]</a><br/> <a href="#">*Hispanics</a><br/> <a href="#">Male</a><br/> <a href="#">Pearson's Correlation Coefficient</a><br/> <a href="#">Prevalence</a><br/> <a href="#">Questionnaires</a><br/> <a href="#">Risk Taking Behavior</a><br/> <a href="#">Sexual Partners</a><br/> <a href="#">*Sexuality</a><br/> <a href="#">Substance Use Disorders / eh [Ethnology]</a><br/> <a href="#">United States</a></p> | <p>Descriptors:<br/> <a href="#">*Sexual Behavior</a><br/> <a href="#">*Acculturation</a><br/> <a href="#">*Risk</a><br/> <a href="#">*Acquired Immune Deficiency Syndrome</a><br/> <a href="#">*Hispanic Americans</a><br/> <a href="#">*Latin American Cultural Groups</a><br/> *Substance Abuse<br/> Los Angeles, California<br/> Drug abuse</p> |
| <p><b>10. Rosenthal, L Scott, DP Kellela, Z Zikarge, A Momoh, M Lahai-Momoh, J Ross, MW Baker, A. (2003).</b> <i>Assessing the HIV/AIDS health services needs of African immigrants to Houston.</i> <u>AIDS Education and Prevention</u>, 15(6), 570-580.</p> | <p>MH - Africa/ethnology<br/> MH - Condoms/utilization<br/> MH - *Emigration and Immigration<br/> MH - Female<br/> MH - HIV Infections/*therapy<br/> MH - Health Knowledge, Attitudes, Practices<br/> MH - Health Services Needs and Demand/<br/> *statistics &amp; numerical data<br/> MH - Humans<br/> MH - Male<br/> MH - Sexual Behavior<br/> MH - Texas</p>                                                                                                                     | <p>Subject Headings:<br/> <a href="#">*Health Care Utilization</a><br/> <a href="#">*Health Knowledge</a><br/> <a href="#">*Health Service Needs</a><br/> <a href="#">*HIV</a><br/> <a href="#">*Immigration</a><br/> <a href="#">AIDS</a><br/> <a href="#">Health Attitudes</a></p> <p>Key concepts:<br/> <a href="#">HIV, AIDS, health service needs, African immigrants, HIV/AIDS knowledge, risk behaviors, health service access</a></p> | <p>not found</p>                                                                                                                                                                                                                                                                                                                                                                                                                                                                                                                                                                                                                                                                                                                                                                                                                                                                                                                    | <p>Descriptors:<br/> <a href="#">*Acquired Immune Deficiency Syndrome</a><br/> <a href="#">*Risk</a><br/> <a href="#">*Immigrants</a><br/> <a href="#">*Southern African Cultural Groups</a><br/> <a href="#">*Houston, Texas</a><br/> <a href="#">*Stigma</a><br/> *Health Care Services</p>                                                       |

|                                                                                                                                                                                                                                                             |                                                                                                                                                                                                                                                                                                                                                                                                                                                                                                                                                                                                      |                  |                  |                  |
|-------------------------------------------------------------------------------------------------------------------------------------------------------------------------------------------------------------------------------------------------------------|------------------------------------------------------------------------------------------------------------------------------------------------------------------------------------------------------------------------------------------------------------------------------------------------------------------------------------------------------------------------------------------------------------------------------------------------------------------------------------------------------------------------------------------------------------------------------------------------------|------------------|------------------|------------------|
| <p><b>11. Castro-Vazquez, G Tarui, M (2006).</b><br/> <i>'Pueblo chico, infierno grande': community support and HIV/AIDS among HIV-positive Latin Americans living in Japan.</i> <u>Ethnicities</u>, 6(1), 52-73.</p>                                       | <p>Not found</p>                                                                                                                                                                                                                                                                                                                                                                                                                                                                                                                                                                                     | <p>Not found</p> | <p>Not found</p> | <p>Not found</p> |
| <p><b>12. Fenton, KA Chinouya, M Davidson, O Copas, (2002).</b><br/> <i>HIV testing and high risk sexual behaviour among London's migrant African communities: a participatory research study.</i> <u>Sexually Transmitted Infections</u>, 78, 241-245.</p> | <p>MH - Adolescent<br/> MH - Adult<br/> MH - Africa South of the Sahara/ethnology<br/> MH - Age Factors<br/> MH - Aged<br/> MH - Chi-Square Distribution<br/> MH - Condoms/utilization<br/> MH - Cross-Sectional Studies<br/> MH - Female<br/> MH - HIV Infections/*diagnosis/ethnology<br/> MH - Humans<br/> MH - Logistic Models<br/> MH - London/epidemiology<br/> MH - Male<br/> MH - Middle Aged<br/> MH - Prevalence<br/> MH - Regression Analysis<br/> MH - *Risk-Taking<br/> MH - Sex Factors<br/> MH - Sexual Behavior/<br/> *statistics &amp; numerical data<br/> MH - Sexual Partners</p> | <p>Not found</p> | <p>Not found</p> | <p>Not found</p> |

|                                                                                                                                                                                                                    |                                                                                                                                                                                                                                                                                                                                                                                                                                                                                                                                     |                                                                                                                                                                                                                                                                                                                                                                                                                                                                                                                                                 |                                                                                                                                                                                                                                                                                                                                                                                                                                                                                                                                                                                                                                                                                                                                                                                                                                                                                                                                                                                                                                                                                                                                                                                                                                                                                                                  |                  |
|--------------------------------------------------------------------------------------------------------------------------------------------------------------------------------------------------------------------|-------------------------------------------------------------------------------------------------------------------------------------------------------------------------------------------------------------------------------------------------------------------------------------------------------------------------------------------------------------------------------------------------------------------------------------------------------------------------------------------------------------------------------------|-------------------------------------------------------------------------------------------------------------------------------------------------------------------------------------------------------------------------------------------------------------------------------------------------------------------------------------------------------------------------------------------------------------------------------------------------------------------------------------------------------------------------------------------------|------------------------------------------------------------------------------------------------------------------------------------------------------------------------------------------------------------------------------------------------------------------------------------------------------------------------------------------------------------------------------------------------------------------------------------------------------------------------------------------------------------------------------------------------------------------------------------------------------------------------------------------------------------------------------------------------------------------------------------------------------------------------------------------------------------------------------------------------------------------------------------------------------------------------------------------------------------------------------------------------------------------------------------------------------------------------------------------------------------------------------------------------------------------------------------------------------------------------------------------------------------------------------------------------------------------|------------------|
| <p><b>13. Deren, S Kang, SY Colon, HM Andia, JF. (2003). Migration and HIV risk behaviours: Puerto Rican injectors in New York City and Puerto Rico. American Journal of Public Health. 93 (5), pp812-816.</b></p> | <p>MH - Adolescent<br/> MH - Adult<br/> MH - Emigration and Immigration/<br/> *statistics &amp; numerical data<br/> MH - Female<br/> MH - HIV<br/> Infections/*ethnology/etiology<br/> MH - Homeless Persons<br/> MH - Humans<br/> MH - Male<br/> MH - Needle Sharing/adverse effects<br/> MH - New York City/epidemiology<br/> MH - Odds Ratio<br/> MH - Puerto Rico/epidemiology/ethnology<br/> MH - *Risk-Taking<br/> MH - Street Drugs/classification<br/> MH - Substance Abuse, Intravenous/<br/> complications/*ethnology</p> | <p>Subject Headings:<br/> <a href="#">*Drug Administration Methods</a><br/> <a href="#">*HIV</a><br/> <a href="#">*Human Migration</a><br/> <a href="#">*Injections</a><br/> <a href="#">*Risk Taking</a><br/> <a href="#">At Risk Populations</a><br/> <a href="#">Intervention</a><br/> <a href="#">Urban Environments</a></p> <p>Key concepts:<br/> <a href="#">New York City, Puerto Rico, HIV risk behaviors, intervention services, Puerto Rican Drug Injectors, migration status, homelessness, risk level, injection drug users</a></p> | <p>Subject headings:<br/> <a href="#">Adult</a><br/> <a href="#">Comparative Studies</a><br/> <a href="#">Confidence Intervals</a><br/> <a href="#">Descriptive Statistics</a><br/> <a href="#">Female</a><br/> <a href="#">Focus Groups</a><br/> <a href="#">Funding Source</a><br/> <a href="#">HIV Education</a><br/> <a href="#">*HIV Infections / pc [Prevention and Control]</a><br/> <a href="#">*HIV Infections / rf [Risk Factors]</a><br/> <a href="#">Health Services Accessibility</a><br/> <a href="#">Homelessness</a><br/> <a href="#">Interviews</a><br/> <a href="#">*Intravenous Drug Users</a><br/> <a href="#">*Intravenous Drug Users</a><br/> <a href="#">Male</a><br/> <a href="#">Middle Age</a><br/> <a href="#">Multiple Logistic Regression</a><br/> <a href="#">Multiple Regression</a><br/> <a href="#">Needle Sharing</a><br/> <a href="#">New York</a><br/> <a href="#">Odds Ratio</a><br/> <a href="#">P-Value</a><br/> <a href="#">Puerto Rico</a><br/> <a href="#">Research Subject Recruitment</a><br/> <a href="#">*Risk Taking Behavior</a><br/> <a href="#">*Substance Abuse, Intravenous Substance Use Rehabilitation Programs / ut [Utilization]</a><br/> <a href="#">Time Factors</a><br/> <a href="#">*Transients and Migrants</a><br/> <a href="#">Urinalysis</a></p> | <p>Not found</p> |
|--------------------------------------------------------------------------------------------------------------------------------------------------------------------------------------------------------------------|-------------------------------------------------------------------------------------------------------------------------------------------------------------------------------------------------------------------------------------------------------------------------------------------------------------------------------------------------------------------------------------------------------------------------------------------------------------------------------------------------------------------------------------|-------------------------------------------------------------------------------------------------------------------------------------------------------------------------------------------------------------------------------------------------------------------------------------------------------------------------------------------------------------------------------------------------------------------------------------------------------------------------------------------------------------------------------------------------|------------------------------------------------------------------------------------------------------------------------------------------------------------------------------------------------------------------------------------------------------------------------------------------------------------------------------------------------------------------------------------------------------------------------------------------------------------------------------------------------------------------------------------------------------------------------------------------------------------------------------------------------------------------------------------------------------------------------------------------------------------------------------------------------------------------------------------------------------------------------------------------------------------------------------------------------------------------------------------------------------------------------------------------------------------------------------------------------------------------------------------------------------------------------------------------------------------------------------------------------------------------------------------------------------------------|------------------|



|                                                                                                                                                                                                                                                                    |                                                                                                                                                                                                                                                                                                                                                                                                                                                                                                                                                    |                                                                                                                                                                                                                                                                                                                                                                                                                                                                                                          |                  |                  |
|--------------------------------------------------------------------------------------------------------------------------------------------------------------------------------------------------------------------------------------------------------------------|----------------------------------------------------------------------------------------------------------------------------------------------------------------------------------------------------------------------------------------------------------------------------------------------------------------------------------------------------------------------------------------------------------------------------------------------------------------------------------------------------------------------------------------------------|----------------------------------------------------------------------------------------------------------------------------------------------------------------------------------------------------------------------------------------------------------------------------------------------------------------------------------------------------------------------------------------------------------------------------------------------------------------------------------------------------------|------------------|------------------|
| <p><b>14. Wiggers, L deWit, JBF Gras, MJ Coutinho, RA Van den Hoek, A.(2003).</b> <i>Risk behaviour and social–cognitive determinants of condom use among ethnic minority communities in Amsterdam.</i> <u>AIDS Education and Prevention</u>, 15 (5), 430-447.</p> | <p>MH - Adolescent<br/> MH - Adult<br/> MH - Africa/ethnology<br/> MH - Chi-Square Distribution<br/> MH - Condoms/*utilization<br/> MH - Cross-Sectional Studies<br/> MH - *Emigration and Immigration<br/> MH - *Ethnic Groups<br/> MH - Female<br/> MH - HIV Seropositivity/diagnosis/epidemiology<br/> MH - Humans<br/> MH - Logistic Models<br/> MH - Male<br/> MH - Netherlands/epidemiology<br/> MH - Netherlands Antilles/ethnology<br/> MH - Prevalence<br/> MH - *Risk-Taking<br/> MH - *Sexual Behavior<br/> MH - Suriname/ethnology</p> | <p>Subject Headings:<br/> <a href="#">*Condoms</a><br/> <a href="#">*Minority Groups</a><br/> <a href="#">*Sexual Attitudes</a><br/> <a href="#">*Sexual Risk Taking</a><br/> <a href="#">*Social Cognition</a><br/> <a href="#">Psychosocial Factors</a><br/> <a href="#">Racial and Ethnic Differences</a></p> <p>Key concepts:<br/> <a href="#">sexual risk behaviors</a>,<br/> <a href="#">condom use</a>, <a href="#">ethnic minorities social cognitive factors</a>, <a href="#">Amsterdam</a></p> | <p>Not found</p> | <p>Not found</p> |
| <p><b>15. Shedlin, MG Decena, CU Oliver-Velez, D. (2005).</b> <i>Initial acculturation and HIV risk among new Hispanic immigrants.</i> <u>Journal of the National Medical Association</u>, 97 (7), s32-s35.</p>                                                    | <p>MH - *Acculturation<br/> MH - Attitude to Health/*ethnology<br/> MH - Central America/ethnology<br/> MH - *Emigration and Immigration<br/> MH - Female<br/> MH - Focus Groups<br/> MH - HIV Infections/epidemiology/*ethnology<br/> MH - Health Behavior/*ethnology<br/> MH - Hispanic Americans/ethnology/*psychology<br/> MH - Humans<br/> MH - Interviews<br/> MH - Male<br/> MH - New York City/epidemiology<br/> MH - Qualitative Research<br/> MH - Risk Assessment<br/> MH - Risk Factors<br/> MH - Time Factors</p>                     | <p>Not found</p>                                                                                                                                                                                                                                                                                                                                                                                                                                                                                         | <p>Not found</p> | <p>Not found</p> |

|                                                                                                                                                                                                                                                                           |                                                                                                                                                                                                                                                                                                                                                                                                                                                                                                                                                                                                                                                    |                  |                                                                                                                                                                                                                                                                                                                                                                                                                                                                                                                                                                                                                                                                                                                                                                                                                                                                                                                                                                                                                                                                                                                                                                                                                |                  |
|---------------------------------------------------------------------------------------------------------------------------------------------------------------------------------------------------------------------------------------------------------------------------|----------------------------------------------------------------------------------------------------------------------------------------------------------------------------------------------------------------------------------------------------------------------------------------------------------------------------------------------------------------------------------------------------------------------------------------------------------------------------------------------------------------------------------------------------------------------------------------------------------------------------------------------------|------------------|----------------------------------------------------------------------------------------------------------------------------------------------------------------------------------------------------------------------------------------------------------------------------------------------------------------------------------------------------------------------------------------------------------------------------------------------------------------------------------------------------------------------------------------------------------------------------------------------------------------------------------------------------------------------------------------------------------------------------------------------------------------------------------------------------------------------------------------------------------------------------------------------------------------------------------------------------------------------------------------------------------------------------------------------------------------------------------------------------------------------------------------------------------------------------------------------------------------|------------------|
| <p><b>16. Lazarus, JV<br/>Himedan, HM<br/>Ostergaard, LR<br/>Liljestrand, J.<br/>(2006). HIV/AIDS<br/>knowledge and<br/>condom use among<br/>Somali and<br/>Sudanese<br/>immigrants in<br/>Denmark.<br/>Scandanavian<br/>Journal of Public<br/>Health, 34, 92-99.</b></p> | <p>MH - Acquired Immunodeficiency Syndrome/epidemiology/prevention &amp; control/<br/>*transmission</p> <p>MH - Adolescent</p> <p>MH - Adult</p> <p>MH - *Condoms</p> <p>MH - Denmark/epidemiology/ethnology</p> <p>MH - *Emigration and Immigration</p> <p>MH - Female</p> <p>MH - HIV Infections/epidemiology/<br/>prevention &amp; control/*transmission</p> <p>MH - Health Education</p> <p>MH - *Health Knowledge, Attitudes, Practices</p> <p>MH - Humans</p> <p>MH - Incidence</p> <p>MH - Interviews</p> <p>MH - Male</p> <p>MH - Questionnaires</p> <p>MH - Sexual Behavior</p> <p>MH - Somalia/ethnology</p> <p>MH - Sudan/ethnology</p> | <p>Not found</p> | <p>Subject headings:</p> <p><a href="#">Adult</a></p> <p><a href="#">Age Factors</a></p> <p><a href="#">*Attitude to AIDS</a></p> <p><a href="#">Birth Place</a></p> <p><a href="#">Chi Square Test</a></p> <p><a href="#">*Condoms / ut [Utilization]</a></p> <p><a href="#">Data Analysis Software</a></p> <p><a href="#">Denmark</a></p> <p><a href="#">Descriptive Statistics</a></p> <p><a href="#">Educational Status</a></p> <p><a href="#">Emigration and Immigration</a></p> <p><a href="#">Female</a></p> <p><a href="#">Fisher's Exact Test</a></p> <p><a href="#">Funding Source</a></p> <p><a href="#">*HIV Education</a></p> <p><a href="#">*HIV Infections / tm [Transmission]</a></p> <p><a href="#">Health Beliefs</a></p> <p><a href="#">*Health Knowledge / ev [Evaluation]</a></p> <p><a href="#">*Immigrants / pf [Psychosocial<br/>Factors]</a></p> <p><a href="#">Male</a></p> <p><a href="#">Middle Age</a></p> <p><a href="#">Purposive Sample</a></p> <p><a href="#">Questionnaires</a></p> <p><a href="#">Semi-Structured Interview</a></p> <p><a href="#">Sex Factors</a></p> <p><a href="#">Somalia</a></p> <p><a href="#">Sudan</a></p> <p><a href="#">Thematic Analysis</a></p> | <p>Not found</p> |
|---------------------------------------------------------------------------------------------------------------------------------------------------------------------------------------------------------------------------------------------------------------------------|----------------------------------------------------------------------------------------------------------------------------------------------------------------------------------------------------------------------------------------------------------------------------------------------------------------------------------------------------------------------------------------------------------------------------------------------------------------------------------------------------------------------------------------------------------------------------------------------------------------------------------------------------|------------------|----------------------------------------------------------------------------------------------------------------------------------------------------------------------------------------------------------------------------------------------------------------------------------------------------------------------------------------------------------------------------------------------------------------------------------------------------------------------------------------------------------------------------------------------------------------------------------------------------------------------------------------------------------------------------------------------------------------------------------------------------------------------------------------------------------------------------------------------------------------------------------------------------------------------------------------------------------------------------------------------------------------------------------------------------------------------------------------------------------------------------------------------------------------------------------------------------------------|------------------|

|                                                                                                                                                                                                                                                                                               |                                                                                                                                                                                                                                                                                                                                                                                                                                                                                                                                       |                                                                                                                                                                                                                                                                                                                                                                                                                                                                                                                                                                                                             |                                                                                                                                                                                                                                                                                                                                                                                                                                                                                                                                                                                                                                                                                                                          |                                                                                                                                                                                                                                                                                   |
|-----------------------------------------------------------------------------------------------------------------------------------------------------------------------------------------------------------------------------------------------------------------------------------------------|---------------------------------------------------------------------------------------------------------------------------------------------------------------------------------------------------------------------------------------------------------------------------------------------------------------------------------------------------------------------------------------------------------------------------------------------------------------------------------------------------------------------------------------|-------------------------------------------------------------------------------------------------------------------------------------------------------------------------------------------------------------------------------------------------------------------------------------------------------------------------------------------------------------------------------------------------------------------------------------------------------------------------------------------------------------------------------------------------------------------------------------------------------------|--------------------------------------------------------------------------------------------------------------------------------------------------------------------------------------------------------------------------------------------------------------------------------------------------------------------------------------------------------------------------------------------------------------------------------------------------------------------------------------------------------------------------------------------------------------------------------------------------------------------------------------------------------------------------------------------------------------------------|-----------------------------------------------------------------------------------------------------------------------------------------------------------------------------------------------------------------------------------------------------------------------------------|
| <p><b>17. Kang, E, Rapkin, BD, Springer, C Kim, JH. (2003). <i>The 'Demon Plague' and access to care among Asian undocumented immigrants living with HIV diseases in New York City.</i> Journal of Immigrant Health, 5(2), 49-58.</b></p>                                                     | <p>MH - Adolescent<br/> MH - Adult<br/> MH - Asian Americans/*psychology<br/> MH - Attitude to Health/*ethnology<br/> MH - Child<br/> MH - Child, Preschool<br/> MH - *Emigration and Immigration<br/> MH - Female<br/> MH - HIV Infections/epidemiology/*ethnology/therapy<br/> MH - *Health Services Accessibility<br/> MH - Health Services Needs and Demand<br/> MH - Health Services Research<br/> MH - Humans<br/> MH - Male<br/> MH - New York City/epidemiology<br/> MH - Pacific Islands/ethnology<br/> MH - Social Work</p> | <p>Not found</p>                                                                                                                                                                                                                                                                                                                                                                                                                                                                                                                                                                                            | <p>Subject headings:<br/> <a href="#">Acquired Immunodeficiency Syndrome / pf [Psychosocial Factors] Adult</a><br/> <a href="#">*Asians</a><br/> <a href="#">Attitude</a><br/> <a href="#">Female</a><br/> <a href="#">Focus Groups</a><br/> <a href="#">Funding Source</a><br/> <a href="#">*HIV Seropositivity / th [Therapy]</a><br/> <a href="#">Health Behavior</a><br/> <a href="#">*Health Services Accessibility</a><br/> <a href="#">*Immigrants</a><br/> <a href="#">Male</a><br/> <a href="#">Medical Care / ut [Utilization] New York</a><br/> <a href="#">Perception</a><br/> <a href="#">Qualitative Studies</a><br/> <a href="#">Semi-Structured Interview</a><br/> <a href="#">Thematic Analysis</a></p> | <p>Not found</p>                                                                                                                                                                                                                                                                  |
| <p><b>18. Poppen, PJ, Reisen, CA, Zea, MC Bianchi, FT Echeverry, JJ (2005). <i>Serostatus disclosure, seroconcordance, partner relationship, and unprotected anal intercourse among HIV-positive Latino men who have sex with men.</i> AIDS Education and Prevention, 17(3), 227-237.</b></p> | <p>MH - Adult<br/> MH - *Anal Canal<br/> MH - *HIV Seropositivity<br/> MH - Hispanic Americans/*psychology<br/> MH - *Homosexuality, Male<br/> MH - Humans<br/> MH - Male<br/> MH - Middle Aged<br/> MH - *Self Disclosure<br/> MH - United States<br/> MH - *Unsafe Sex</p>                                                                                                                                                                                                                                                          | <p>Subject Headings:<br/> <a href="#">*HIV</a><br/> <a href="#">*Male Homosexuality</a><br/> <a href="#">*Safe Sex</a><br/> <a href="#">*Sexual Risk Taking</a><br/> <a href="#">*Risk Assessment</a><br/> <a href="#">Hispanics</a><br/> <a href="#">Self Disclosure</a><br/> <a href="#">Sexual Partners</a></p> <p>Key concepts:<br/> <a href="#">serostatus disclosure,</a><br/> <a href="#">seroconcordance,</a> <a href="#">sexual partner relationship,</a><br/> <a href="#">unprotected anal intercourse,</a><br/> <a href="#">HIV positive Latino men,</a><br/> <a href="#">homosexual men</a></p> | <p>Not found</p>                                                                                                                                                                                                                                                                                                                                                                                                                                                                                                                                                                                                                                                                                                         | <p>Descriptors:<br/> <a href="#">*Human immunodeficiency virus--HIV</a><br/> <a href="#">*Health risk assessment</a><br/> <a href="#">*Sexual behavior</a><br/> <a href="#">*Hispanic Americans</a><br/> <a href="#">*Epidemics</a><br/> <a href="#">*Gays &amp; lesbians</a></p> |

|                                                                                                                                                                                       |                                                                                                                                                                                                                                                                                                                                                                                                                                                                                                                                                                                                                                                         |                  |                                                                                                                                                                                                                                                                                                                                                                                                                                                                                                                                                                                                                                                                                                                                                                                                                                                                                              |                                                                                                                                                     |
|---------------------------------------------------------------------------------------------------------------------------------------------------------------------------------------|---------------------------------------------------------------------------------------------------------------------------------------------------------------------------------------------------------------------------------------------------------------------------------------------------------------------------------------------------------------------------------------------------------------------------------------------------------------------------------------------------------------------------------------------------------------------------------------------------------------------------------------------------------|------------------|----------------------------------------------------------------------------------------------------------------------------------------------------------------------------------------------------------------------------------------------------------------------------------------------------------------------------------------------------------------------------------------------------------------------------------------------------------------------------------------------------------------------------------------------------------------------------------------------------------------------------------------------------------------------------------------------------------------------------------------------------------------------------------------------------------------------------------------------------------------------------------------------|-----------------------------------------------------------------------------------------------------------------------------------------------------|
| <p><b>19. Korner, H (2007).</b> <i>'If I had my residency I wouldn't worry': Negotiating migration and HIV in Sydney, Australia.</i> <u>Ethnicity and Health.</u> 12(3), 205-225.</p> | <p>MH - Acculturation<br/> MH - Adolescent<br/> MH - Adult<br/> MH - Emigration and Immigration/<br/> *legislation &amp; jurisprudence/trends<br/> MH - Female<br/> MH - HIV Seropositivity/ethnology/<br/> *psychology<br/> MH - *Health Policy<br/> MH - *Health Services Accessibility<br/> MH - Humans<br/> MH - Interpersonal Relations<br/> MH - Interviews<br/> MH - Language<br/> MH - Life Change Events<br/> MH - Male<br/> MH - Middle Aged<br/> MH - Narration<br/> MH - New South Wales/epidemiology<br/> MH - Quality of Life/*psychology<br/> MH - Social Support<br/> MH - Uncertainty<br/> MH - Urban Health Services/*utilization</p> | <p>Not found</p> | <p>Subject headings:<br/> <a href="#">Adult</a><br/> <a href="#">Attitude to AIDS</a><br/> <a href="#">Audiorecording</a><br/> <a href="#">Culture</a><br/> <a href="#">Descriptive Statistics</a><br/> <a href="#">*Emigration and Immigration</a><br/> <a href="#">Female</a><br/> <a href="#">Funding Source</a><br/> <a href="#">*HIV Infections / pf [Psychosocial Factors]</a><br/> <a href="#">Health Services Accessibility</a><br/> <a href="#">*Hepatitis C / pf [Psychosocial Factors]</a><br/> <a href="#">Male</a><br/> <a href="#">Middle Age</a><br/> <a href="#">New South Wales</a><br/> <a href="#">Phenomenological Research</a><br/> <a href="#">Semi-Structured Interview</a><br/> <a href="#">Social Networks</a><br/> <a href="#">Stigma</a><br/> <a href="#">Support, Psychosocial</a><br/> <a href="#">*Transients and Migrants / pf [Psychosocial Factors]</a></p> | <p>Descriptors:<br/> *Migrants<br/> *Immigration Policy<br/> *Relocation<br/> *Acquired Immune Deficiency Syndrome<br/> *Australia<br/> *Stigma</p> |
|---------------------------------------------------------------------------------------------------------------------------------------------------------------------------------------|---------------------------------------------------------------------------------------------------------------------------------------------------------------------------------------------------------------------------------------------------------------------------------------------------------------------------------------------------------------------------------------------------------------------------------------------------------------------------------------------------------------------------------------------------------------------------------------------------------------------------------------------------------|------------------|----------------------------------------------------------------------------------------------------------------------------------------------------------------------------------------------------------------------------------------------------------------------------------------------------------------------------------------------------------------------------------------------------------------------------------------------------------------------------------------------------------------------------------------------------------------------------------------------------------------------------------------------------------------------------------------------------------------------------------------------------------------------------------------------------------------------------------------------------------------------------------------------|-----------------------------------------------------------------------------------------------------------------------------------------------------|

|                                                                                                                                                                                                                                                          |                                                                                                                                                                                                                                                                                                                                                                                                                                                                                                                                                                                    |                                                                                                                                                                                                                                                                                                                                                                                                                                                                                                                                                                                                                                                                                                         |                                                                                                                                                                                                                                                                                                                                                                                                                                                                                                                                                                                                                                                                                                                                                                                                                                                                                                                                                                                                                                   |                                                                                                                                                                                                                                                                                                                                    |
|----------------------------------------------------------------------------------------------------------------------------------------------------------------------------------------------------------------------------------------------------------|------------------------------------------------------------------------------------------------------------------------------------------------------------------------------------------------------------------------------------------------------------------------------------------------------------------------------------------------------------------------------------------------------------------------------------------------------------------------------------------------------------------------------------------------------------------------------------|---------------------------------------------------------------------------------------------------------------------------------------------------------------------------------------------------------------------------------------------------------------------------------------------------------------------------------------------------------------------------------------------------------------------------------------------------------------------------------------------------------------------------------------------------------------------------------------------------------------------------------------------------------------------------------------------------------|-----------------------------------------------------------------------------------------------------------------------------------------------------------------------------------------------------------------------------------------------------------------------------------------------------------------------------------------------------------------------------------------------------------------------------------------------------------------------------------------------------------------------------------------------------------------------------------------------------------------------------------------------------------------------------------------------------------------------------------------------------------------------------------------------------------------------------------------------------------------------------------------------------------------------------------------------------------------------------------------------------------------------------------|------------------------------------------------------------------------------------------------------------------------------------------------------------------------------------------------------------------------------------------------------------------------------------------------------------------------------------|
| <p><b>20. Nemoto, T Iwanamoto, M Oh, HJ Wong, S Nguyen, H. (2005). Risk behaviours among Asian women who work at massage parlours in San Francisco: Perspectives from masseuses and owner/managers. AIDS Education and Prevention 17(5), 444-456</b></p> | <p>MH - Asian Americans/*psychology<br/> MH - Condoms/utilization<br/> MH - Female<br/> MH - Focus Groups<br/> MH - HIV Infections/ethnology/transmission<br/> MH - Humans<br/> MH - Interviews<br/> MH - Massage/*manpower<br/> MH - Prostitution/*ethnology<br/> MH - *Risk-Taking<br/> MH - San Francisco/epidemiology<br/> MH - Sexually Transmitted Diseases/epidemiology/ethnology<br/> MH - Substance-Related Disorders/epidemiology/ethnology<br/> MH - Thailand/ethnology<br/> MH - Unsafe Sex/*ethnology/statistics &amp; numerical data<br/> MH - Vietnam/ethnology</p> | <p>Subject Headings:<br/> <a href="#">*AIDS Prevention</a><br/> <a href="#">*Asians</a><br/> <a href="#">*Human Females</a><br/> <a href="#">*Sexual Risk Taking</a><br/> <a href="#">*Sociocultural Factors</a><br/> <a href="#">Business</a><br/> <a href="#">HIV</a><br/> <a href="#">Massage</a><br/> <a href="#">Risk Factors</a><br/> <a href="#">Sex</a></p> <p>Key concepts:<br/> <a href="#">behavior</a>, <a href="#">Asian women</a>, <a href="#">massage parlor workers</a>, <a href="#">cognitive factors</a>, <a href="#">cultural factors</a>, <a href="#">contextual factors</a>, <a href="#">sex work</a>, <a href="#">masseuses</a>, <a href="#">parlor owners &amp; managers</a></p> | <p>Subject headings:<br/> <a href="#">*Asians</a><br/> <a href="#">*Asians / pf [Psychosocial Factors]</a><br/> <a href="#">Audiorecording</a><br/> <a href="#">Condoms / ut [Utilization]</a><br/> <a href="#">Descriptive Statistics</a><br/> <a href="#">Female</a><br/> <a href="#">Focus Groups</a><br/> <a href="#">Funding Source</a><br/> <a href="#">HIV Infections / eh [Ethnology]</a><br/> <a href="#">HIV Infections / ep [Epidemiology]</a><br/> <a href="#">Interviews</a><br/> <a href="#">*Massage</a><br/> <a href="#">*Prostitution / eh [Ethnology]</a><br/> <a href="#">*Risk Taking Behavior / eh [Ethnology]</a><br/> <a href="#">Sexually Transmitted Diseases / eh [Ethnology]</a><br/> <a href="#">Sexually Transmitted Diseases / ep [Epidemiology]</a><br/> <a href="#">Socioeconomic Factors</a><br/> <a href="#">Substance Use Disorders / eh [Ethnology]</a><br/> <a href="#">Substance Use Disorders / ep [Epidemiology]</a><br/> <a href="#">Thailand</a><br/> <a href="#">United States</a></p> | <p>Descriptors:<br/> <a href="#">*Prostitution</a><br/> <a href="#">*Southeast Asian Cultural Groups</a><br/> <a href="#">*Asian Americans</a><br/> <a href="#">*Acquired Immune Deficiency Syndrome</a><br/> <a href="#">*Sexual Behavior</a><br/> <a href="#">*Risk Factors</a><br/> *Females<br/> San Francisco, California</p> |
| <p><b>TOTAL (found on each database)</b></p>                                                                                                                                                                                                             | <p><b>17</b></p>                                                                                                                                                                                                                                                                                                                                                                                                                                                                                                                                                                   | <p><b>12</b></p>                                                                                                                                                                                                                                                                                                                                                                                                                                                                                                                                                                                                                                                                                        | <p><b>12</b></p>                                                                                                                                                                                                                                                                                                                                                                                                                                                                                                                                                                                                                                                                                                                                                                                                                                                                                                                                                                                                                  | <p><b>9</b></p>                                                                                                                                                                                                                                                                                                                    |
